# Supplementary material for: HIV-2 infects resting CD4+ T cells but not monocyte-derived dendritic cells
Source: PubMed Central journal article supplement (PMC4307230; doi:10.1186/s12977-014-0131-7), 2015-01-13

Fig S1.

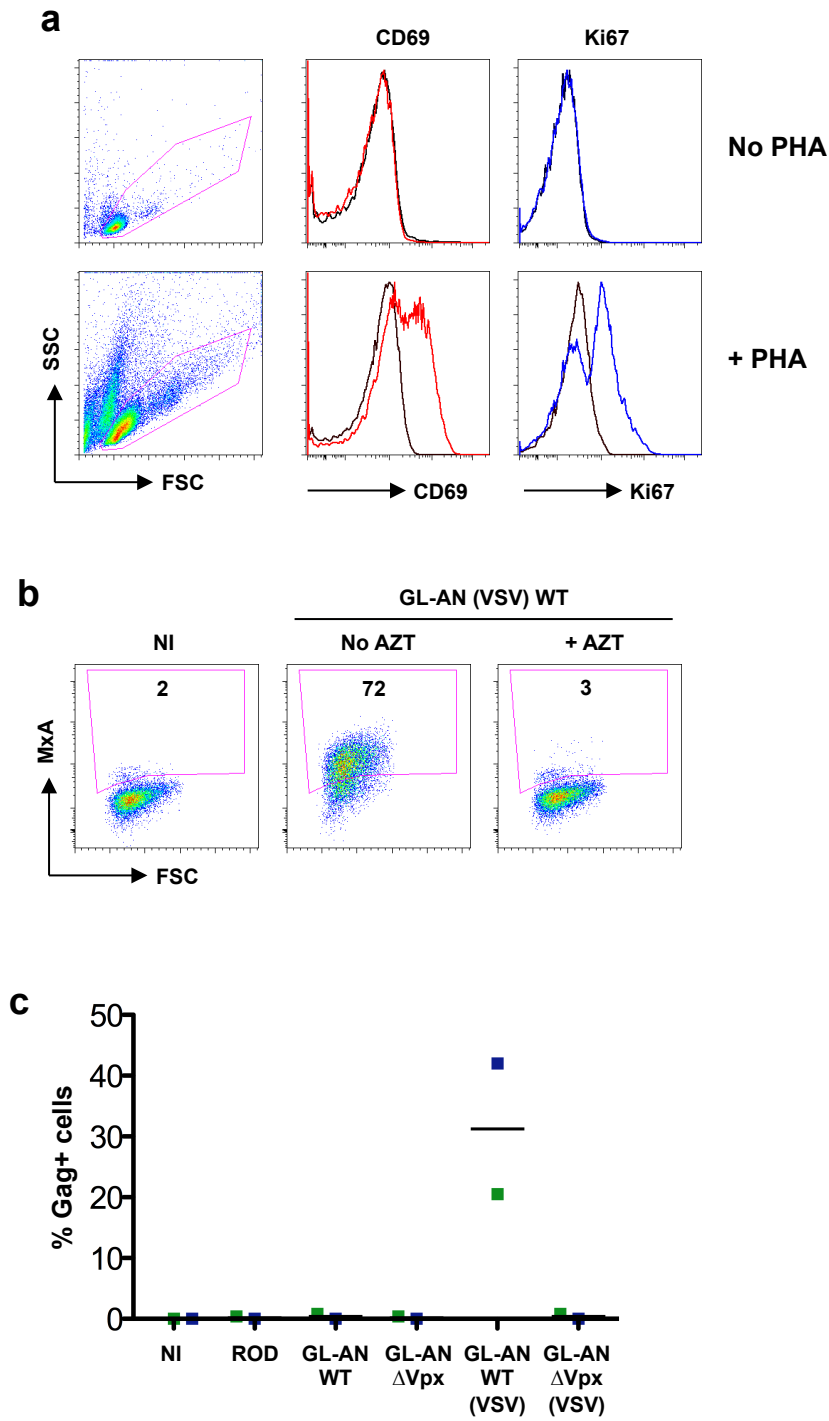

Supplement: 12977_2014_131_MOESM1_ESM.pdf [file 12977_2014_131_MOESM1_ESM.pdf]
